# Supplementary material for: Molecular signatures reflecting microenvironmental metabolism and chemotherapy-induced immunogenic cell death in colorectal liver metastases
Source: PubMed Central journal article supplement (PMC5652706; doi:10.18632/oncotarget.19350), 2017-07-18
Supplement: oncotarget-08-76290-s001.pdf [file oncotarget-08-76290-s001.pdf]

## Molecular signatures reflecting microenvironmental metabolism and chemotherapy-induced immunogenic cell death in colorectal liver metastases

### SUPPLEMENTARY MATERIALS

**Supplementary Table 1: Primers used for RT-qPCR validation**

| Gene symbol    | ID (Pubmed) | Forward primer |                       | Reverse primer |                       |
|----------------|-------------|----------------|-----------------------|----------------|-----------------------|
| <i>AXIN2</i>   | 6653583     | 2066           | AGTCAGCAGAGGGACAGGAA  | 2182           | GTGGACACCTGCCAGTTTCT  |
| <i>APC2</i>    | 57242791    | 8769           | ACCCCCAGTTAACTGCTG    | 8888           | GGCACACCTCGGTGACTTAT  |
| <i>DMBT1</i>   | 157423469   | 4259           | ATCTCCAATCCTTGGGCTTT  | 4380           | GCAGCCTGAGTAGGGAATTG  |
| <i>PLA2G2A</i> | 13543520    | 765            | CCCTCCCTACCCTAACCAAG  | 882            | GCTGGAAATCTGCTGGATGT  |
| <i>TGFBR3</i>  | 223459585   | 1445           | ACCCTGTCATTCCCAGCATA  | 1561           | CAGCCACGATCATCTTCTCA  |
| <i>HOXA7A</i>  | 84105267    | 1216           | TATCCCAACTGGCAGACA    | 1339           | GGCACTAGGTAGCAGGCAAG  |
| <i>CECR1</i>   | 30704989    | 2572           | TCCCATAGCTGGTGAAGGAC  | 2692           | GATGAGGGATGCGTTCTGAT  |
| <i>CSF1R</i>   | 28833090    | 966            | CCAAAAAGTCCTGACCCTCA  | 1086           | CTCTACCACCCGGAAGAACA  |
| <i>FABP6</i>   | 894182      | 146            | CGCAACTTCAAGATCGTCAC  | 264            | ATGTTGCTTTCCTTGCCAAC  |
| <i>TFF3</i>    | 17389673    | 349            | CAGGCACTGTTTCATCTCAGC | 455            | GAGCATGGGACCTTTATTTCG |
| <i>TRIM7</i>   | 124376611   | 1937           | AAGCCAGTCTGCTGTTCTC   | 2059           | GAGGTCCCAACCTCTCAA    |
| <i>PLA2G2F</i> | 145553988   | 1234           | GTGGCTACTTTGGGCTTGAA  | 1356           | ACACTCAGCACTGCACATCC  |
| <i>GAPDH</i>   | 53734501    | 1045           | GGCCTCCAAGGAGTAAGACC  | 1166           | AGGGGAGATTGAGTGTGGTG  |
| <i>CHKA</i>    | 34192558    | 1187           | GCCTGCATTCCAAAATGACT  | 1301           | TCCCCAGAGGAAATGAGATG  |

**Supplementary Table 2: Somatic variants**

See Supplementary File 1

**Supplementary Table 3: Univariable Cox proportional hazard analysis of OS and DFS, including DEGs**

See Supplementary File 2

**Supplementary Data\_set1-12: Gene expression data**

See Supplementary File 3

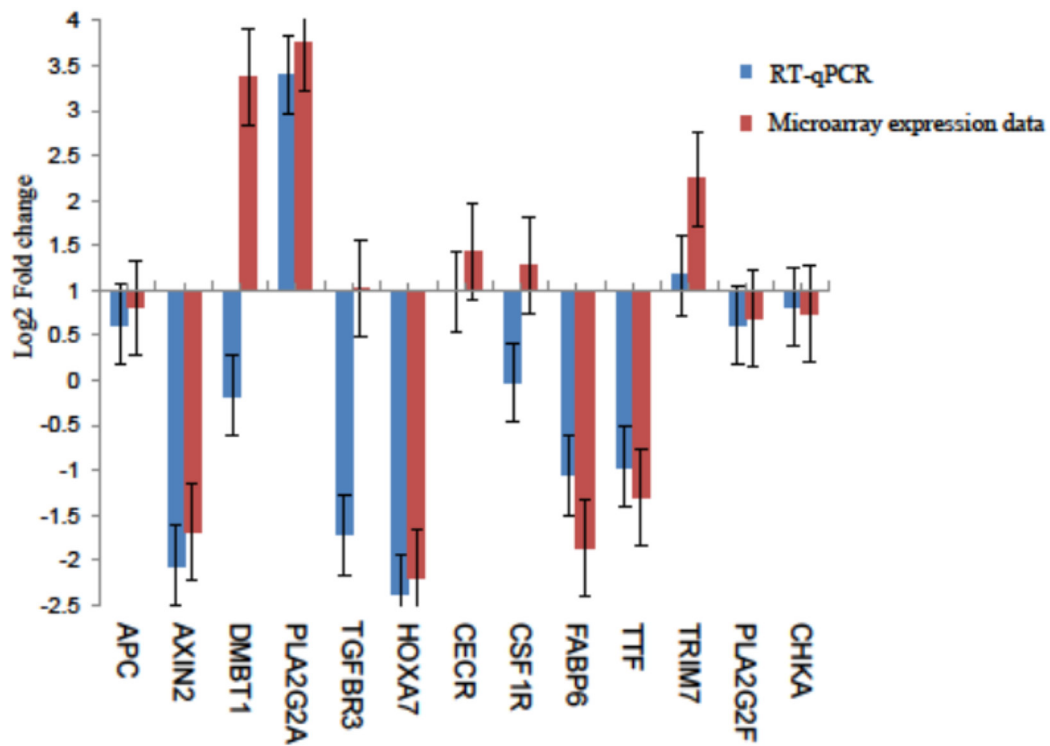

**Supplementary Figure 1: RT-qPCR Validation.** Validation of differentially expressed genes by RT-qPCR. Log<sub>2</sub> fold changes in microarray data (red bars) were validated by RT-qPCR (blue bars) using *GAPDH* as a reference gene.

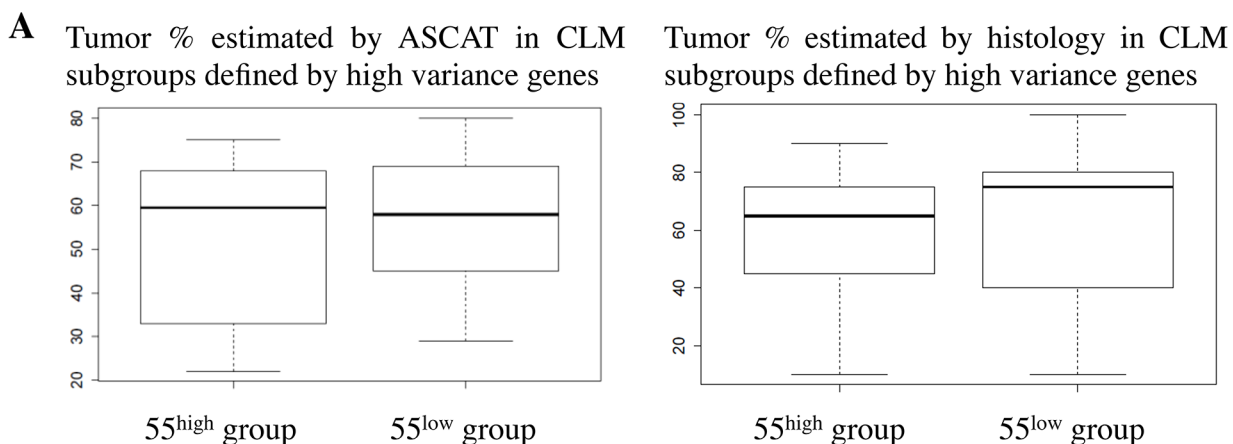

**B**

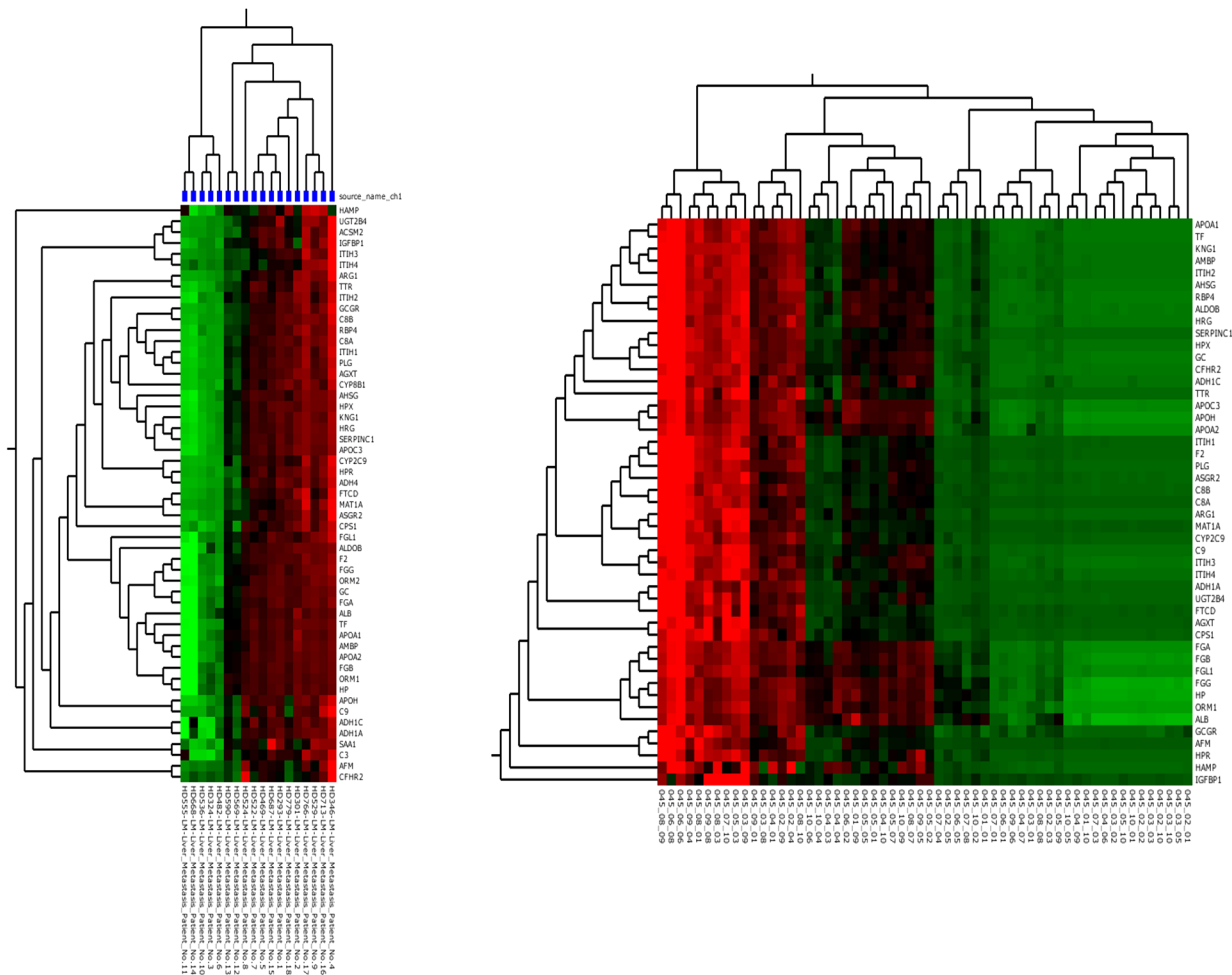

**Supplementary Figure 2: Tumor percentage estimation.** (A) Estimation of tumor percentage in samples by ASCAT and histology in the two subgroups of metastases differing by high or low expression of 55 genes exhibiting high variance in the gene expression data set. Neither estimate showed significant differences in tumor content between the two groups. (B) Expression pattern of the 55 gene cluster in CLM in two publicly available cohorts (GSE14297 [15], GSE5851 [16]). The samples/genes were subjected to clustering analysis. Red-green scale: red represents high expression and green low expression. The expression of the 55 genes is commonly up- or down-regulated, forming two main subgroups and parallel to the CoMet gene expression pattern.
